# Supplementary material
Source: Springer Nature journal article supplement (https://www.springermedizin.de/resource/supplementary/12931_2010_1036_MOESM4_ESM.pdf/9425374)

A. Healthy control

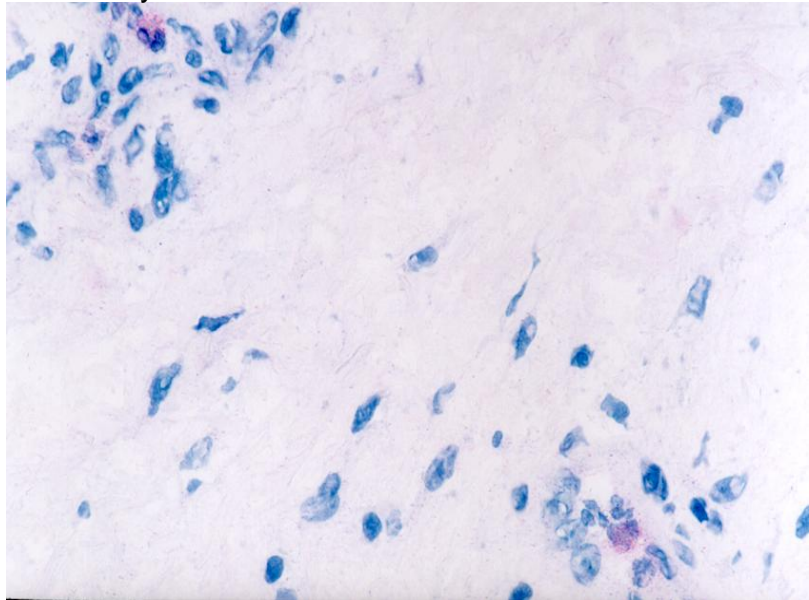

B. Allergic asthma

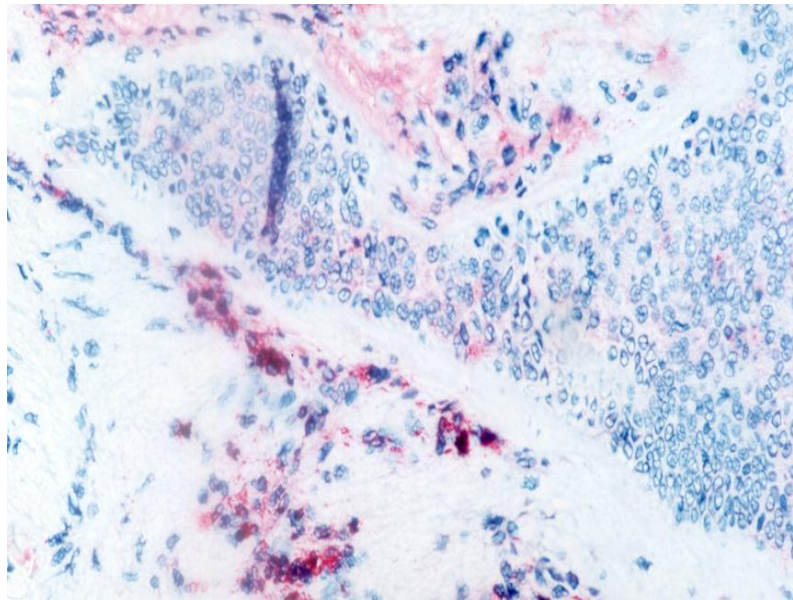

Supplement: MOESM4 [file 9425374]
